# Supplementary material
Source: PubMed Central journal article supplement (PMC8373215)
Supplement: jcm.00319-21-s0001.pdf [file jcm.00319-21-s0001.pdf]

## Supplemental Material

### **Performance of three SARS-CoV-2 immunoassays, three rapid lateral flow tests and a novel bead-based affinity surrogate test for the detection of SARS-CoV-2 antibodies in human serum**

Manuel Krone<sup>1</sup>, Julia Gütling<sup>1</sup>, Johannes Wagener<sup>1,2</sup>, Thiên-Trí Lâm<sup>1</sup>, Christoph Schoen<sup>1</sup>, Ulrich Vogel<sup>1</sup>, August Stich<sup>3</sup>, Florian Wedekink<sup>4</sup>, Jörg Wischhusen<sup>4</sup>, Thomas Kerkau<sup>5</sup>, Niklas Beyersdorf<sup>5</sup>, Silvana Klingler<sup>6</sup>, Simone Backes<sup>5</sup>, Lars Dölken<sup>5</sup>, Georg Gasteiger<sup>6</sup>, Oliver Kurzai<sup>1</sup> and Alexandra Schubert-Unkmeir<sup>1</sup>

<sup>1</sup> Institute for Hygiene and Microbiology, University of Wuerzburg, Wuerzburg, Germany

<sup>2</sup> Department of Clinical Microbiology, Trinity College Dublin, St James's Hospital Campus, Dublin, Ireland.

<sup>3</sup> Department of Tropical Medicine, Missioklinik, Klinikum Wuerzburg Mitte, Wuerzburg, Germany

<sup>4</sup> Department of Gynecology, Section for Experimental Tumor Immunology, University Hospital Wuerzburg, Wuerzburg, Germany

<sup>5</sup> Institute for Virology and Immunobiology, University of Wuerzburg, Wuerzburg, Germany

<sup>6</sup> Institute of Systems Immunology, University of Wuerzburg, Wuerzburg, Germany

Corresponding author: [aunkmeir@hygiene.uni-wuerzburg.de](mailto:aunkmeir@hygiene.uni-wuerzburg.de)
